# Supplementary material for: Modeling human skeletal development using human pluripotent stem cells
Source: PubMed Central journal article supplement — Proc Natl Acad Sci U S A. 2023 May 1;120(19):e2211510120. doi: 10.1073/pnas.2211510120 (PMC10175848; doi:10.1073/pnas.2211510120), 2023-05-01
Supplement: pnas.2211510120.sapp.pdf [file pnas.2211510120.sapp.pdf]

## Supporting Information for Modeling human skeletal development using human pluripotent stem cells

Shireen R Lamandé<sup>1,2\*</sup>, Elizabeth S Ng<sup>1,3</sup>, Trevor L Cameron<sup>1</sup>, Louise HW Kung<sup>1</sup>, Lisa Sampurno<sup>1</sup>, Lynn Rowley<sup>1</sup>, Jinia Lilianty<sup>1,2</sup>, Yudha Nur Patria<sup>1,2,4</sup>, Tayla Stenta<sup>1</sup>, Eric Hanssen<sup>5</sup>, Katrina M Bell<sup>1</sup>, Ritika Saxena<sup>1,2</sup>, Kathryn S Stok<sup>6</sup>, Edouard G Stanley<sup>1,2,3,7</sup>, Andrew G Elefanty<sup>1,2,3,7</sup>, John F Bateman<sup>1,2</sup>

<sup>1</sup>Murdoch Children's Research Institute, Parkville, Australia, <sup>2</sup>Department of Paediatrics, University of Melbourne, Parkville, Australia, <sup>3</sup>The Novo Nordisk Foundation Center for Stem Cell Medicine (reNEW), Murdoch Children's Research Institute, Parkville, Australia, <sup>4</sup>Department of Child Health, Universitas Gadjah Mada, Indonesia, <sup>5</sup>Ian Holmes Imaging Center and Department of Biochemistry and Pharmacology, Bio21 Institute, University of Melbourne, Parkville, Australia, <sup>6</sup>Department of Biomedical Engineering, University of Melbourne, Parkville, Australia, <sup>7</sup>Department of Anatomy and Developmental Biology, Monash University, Clayton, Australia

\*Corresponding author: Shireen R Lamandé  
Email: [shireen.lamande@mcri.edu.au](mailto:shireen.lamande@mcri.edu.au)

### This PDF file includes:

Supporting methods  
Figures S1 to S7  
Table S1  
SI References

## Supporting methods

### Quantitative RT-PCR

RNA was extracted from monolayer cultures using TRIzol (ThermoFisher Scientific) following the manufacturer's instructions. Typically, 100-200ng total RNA was used for cDNA synthesis in a total volume of 20 $\mu$ l using the QuantiTect<sup>®</sup> Reverse Transcription kit (Qiagen) according to the manufacturer's instructions. Quantitative RT-PCR (qPCR) was performed in triplicate with the Brilliant III Ultra-Fast SYBR Green QRT-PCR Kit (Agilent) using 10  $\mu$ l reactions consisting of 1 $\times$  Brilliant III Ultra-Fast SYBR Green QRT-PCR Master Mix, 1  $\mu$ l cDNA, and 1  $\mu$ M each primer. Amplification was performed in a 384 well plate format on the LightCycler 480 Instrument II (Roche Life Sciences), using a thermocycling protocol involving 40 cycles of denaturation at 95°C for 20 seconds, annealing at 55°C for 20 seconds, and amplification at 72°C for 20 seconds. Gene-specific primers were designed using Primer-BLAST (NCBI) (Table S1). To avoid amplification from genomic DNA, primer sets were designed to span multiple exons and PCR products analyzed by agarose gel electrophoresis to confirm single products corresponding to the predicted cDNA amplicons for each gene. Analyses used LightCycler 480 Software (release 1.5.1.62). Human  $\beta$ -actin (*ACTB*) was routinely used as a house-keeping reference gene. Graphs were drawn using GraphPad Prism 9.

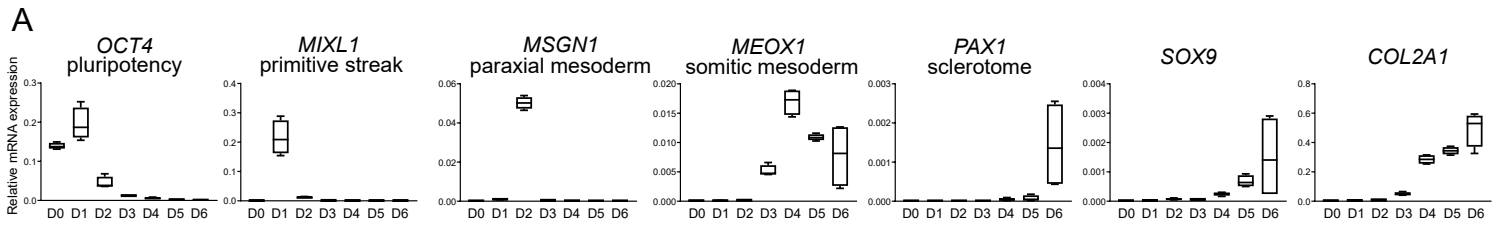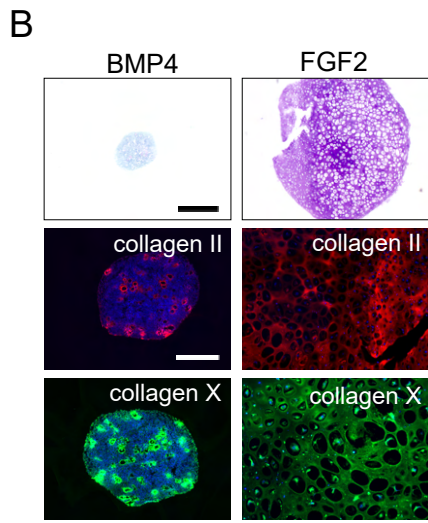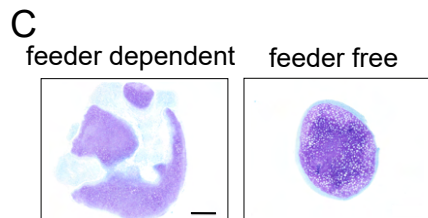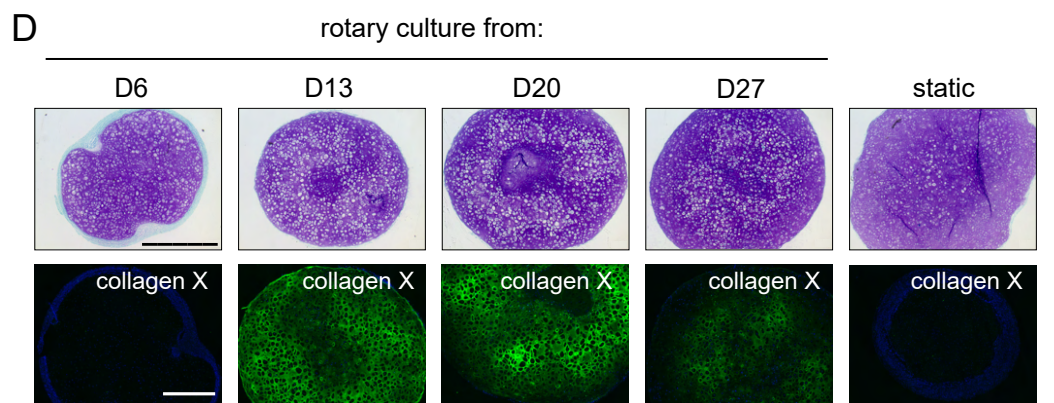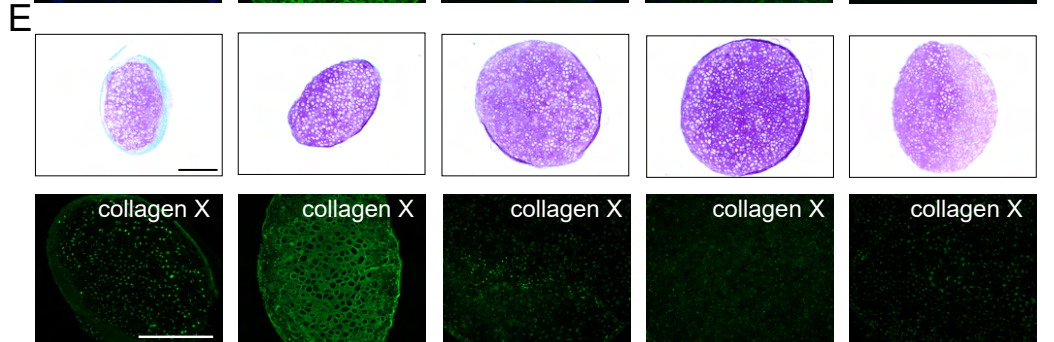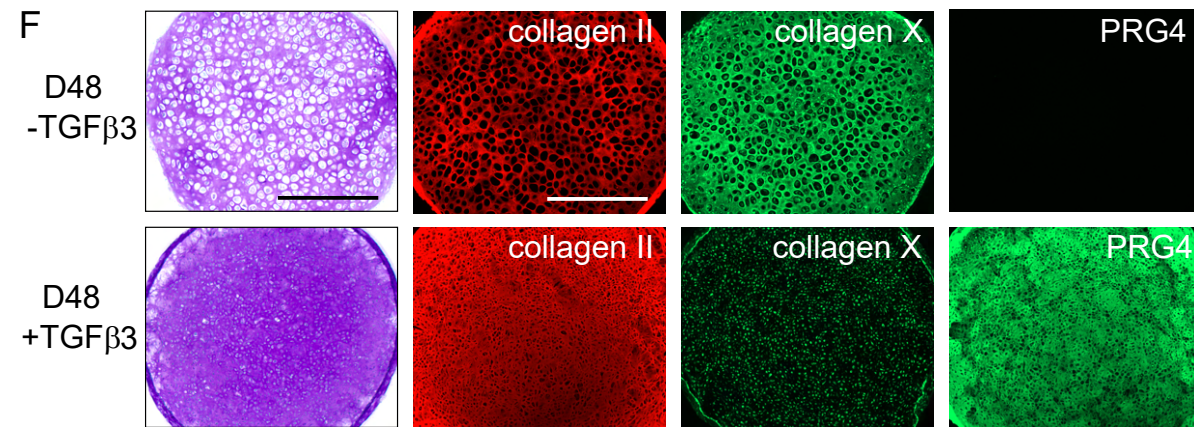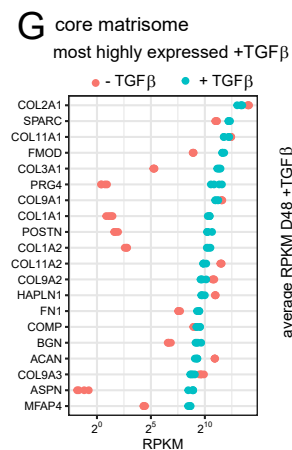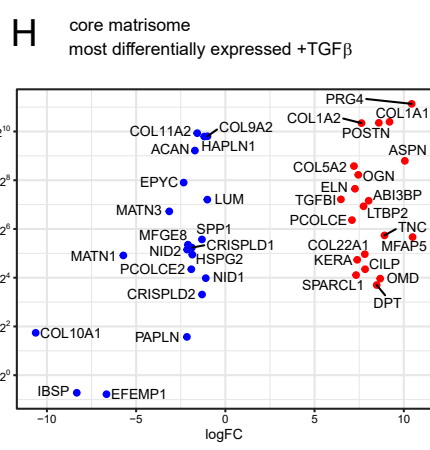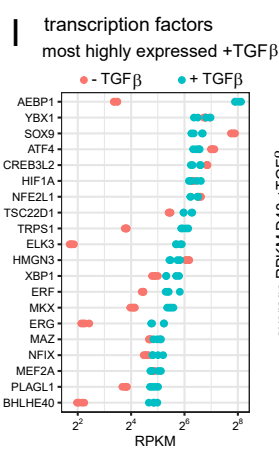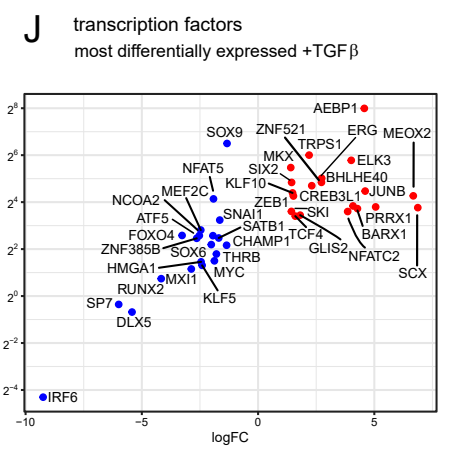

**Fig. S1.** (A) Gene expression of stage specific markers during the 6-day differentiation to sclerotome in iPSC line MCRIi019-A. N = 4 parallel differentiations. (B) The iPSC line MCRIi018-B was differentiated to sclerotome with cell pellets formed at day 4 and retained in static pellet culture throughout. At the end of day 6, pellets were supplemented with either 20 ng/ml BMP4 or 20 ng/ml FGF2 for 14 days. Toluidine blue (scale bar is 500  $\mu$ m) and collagen II and X immunostained pellet sections (scale bar is 200  $\mu$ m) at day 48. (C) MCRIi001-A-2 was adapted to feeder free conditions, then feeder-dependent and feeder-free versions differentiated to chondrocytes with pellets transferred to rotary culture at the end of day 6. Toluidine blue stained chondronoids at day 62. Scale bar is 500  $\mu$ m. (D, E) Rotary culture influences chondrocyte maturity. The iPSC lines MCRIi001-A-2 (D) and MCRIi019-A (E) were differentiated to sclerotome with cell pellets formed at day 4. At the end of day 6, pellets were supplemented with 20 ng/ml FGF2 for 14 days. Some pellets were transferred to rotary culture at the end of day 6, day 13, day 20 or day 27 and some remained in static culture. Toluidine blue and collagen X immunostained pellets at day 48. Scale bars are 500  $\mu$ m. (F) TGF $\beta$ 3 induces an articular chondrocyte phenotype. The iPSC line MCRIi019-A was differentiated to sclerotome with cell pellets formed at day 4. At the end of day 6 all sclerotome pellets were supplemented with 20 ng/ml FGF2 for 14 days and some pellets were treated with 10 ng/ml TGF $\beta$ 3 from day 13. Pellets were transferred to rotary culture at day 20. Histology and collagen II, collagen X and PRG4 immunostaining at day 48. Scale bars are 500  $\mu$ m. (G) mRNA abundance ( $\log_2$  RPKM) of the 20 core matrisome components most highly expressed at day 48 in TGF $\beta$ 3 treated chondronoids. Abundance in untreated chondronoids is shown for comparison. (H) mRNA abundance at day 48 in TGF $\beta$ 3 treated chondronoids (average  $\log_2$  RPKM) of the 20 most upregulated and 20 most downregulated core matrisome genes ( $\log_2$ FC, adj.P.value < 0.05, average RPKM >10 in at least one treatment group). (I) mRNA abundance ( $\log_2$  RPKM) of the 20 transcription factors most highly expressed at day 48 in TGF $\beta$ 3 treated chondronoids. Abundance in untreated chondronoids is shown for comparison. (J) mRNA abundance at day 48 in TGF $\beta$ 3 treated chondronoids (average  $\log_2$  RPKM) of the 20 most upregulated and 20 most downregulated transcription factor genes ( $\log_2$ FC, adj.P.value < 0.05, average RPKM >10 in at least one treatment group). RNAseq data N = 4 parallel differentiations.

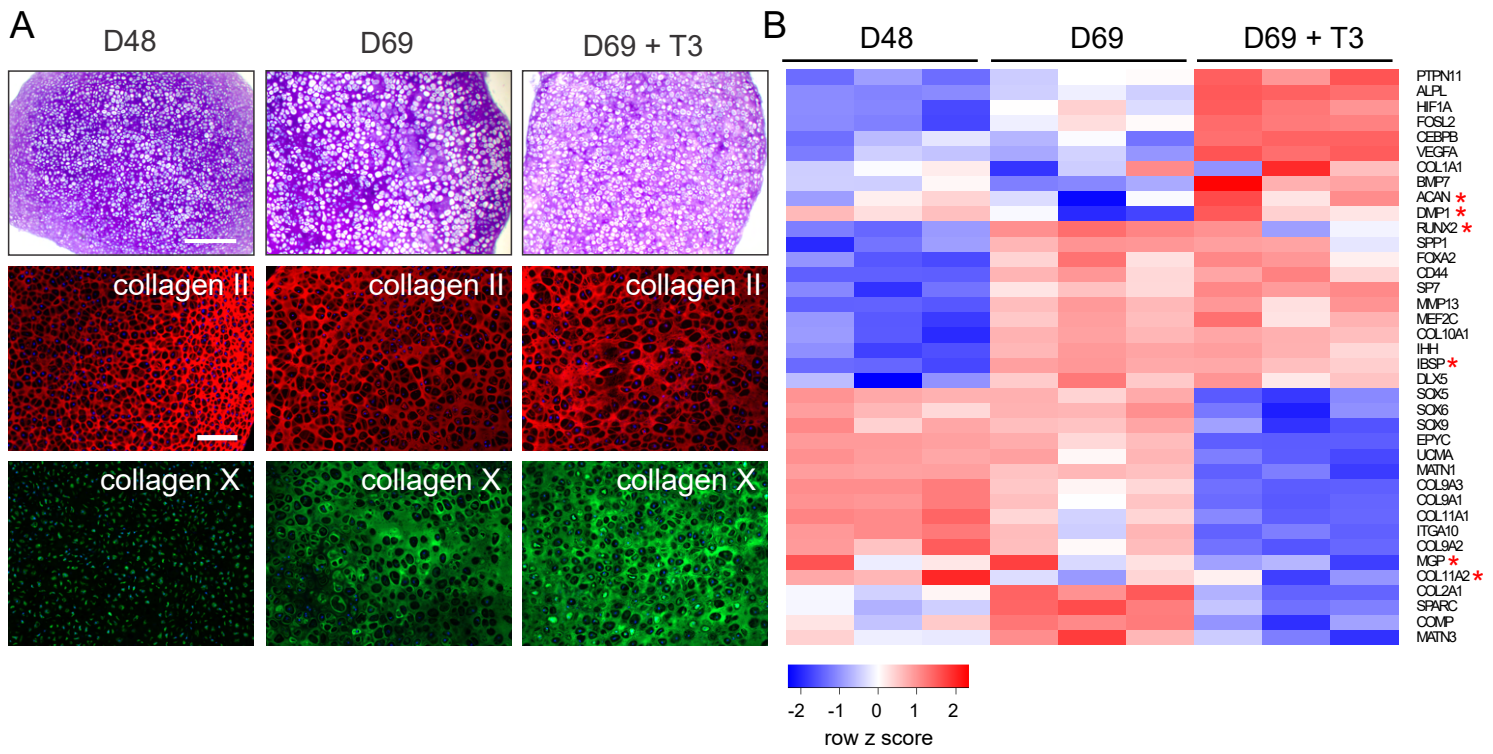

**C** Most highly expressed core matrisome genes

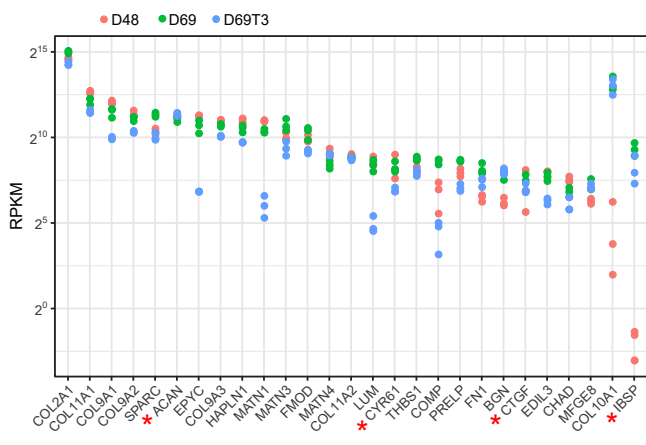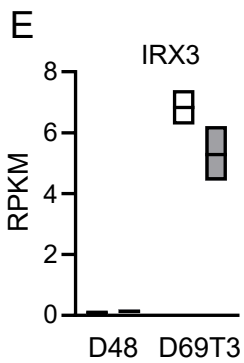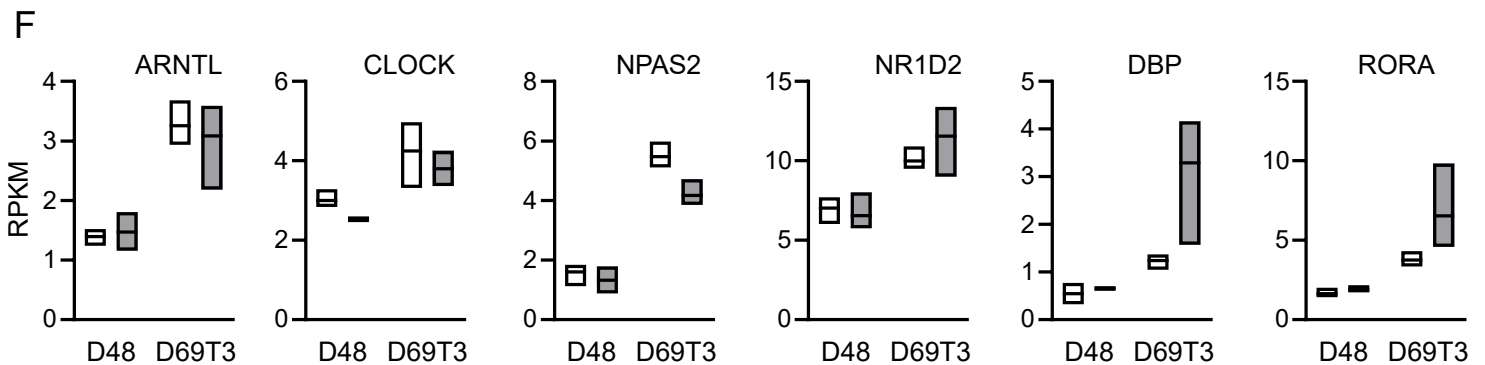

**D** Dynamically regulated transcription factors

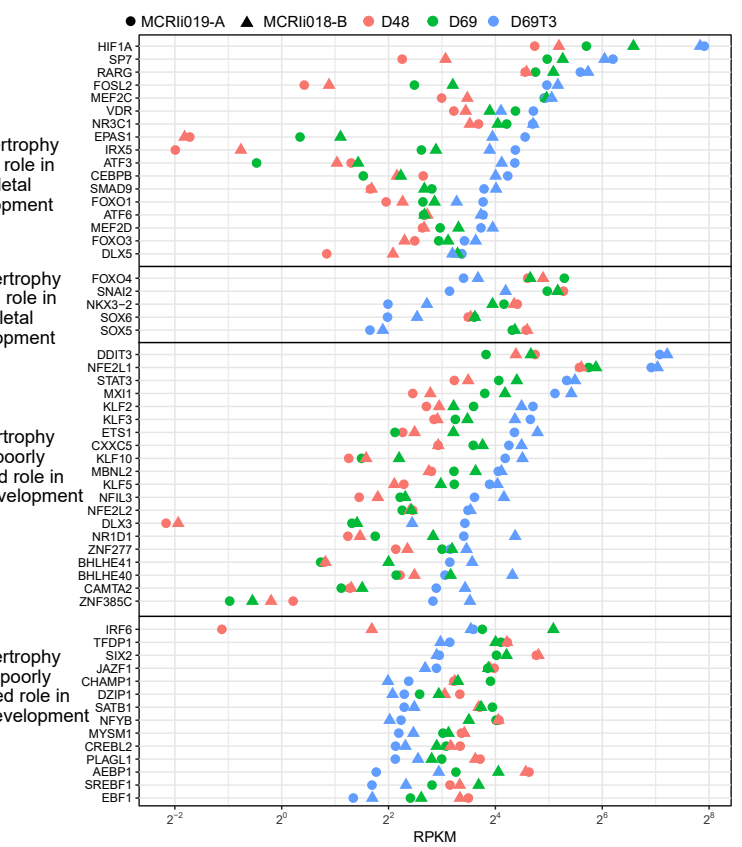

**Fig. S2.** Reproducible differentiation to hypertrophic cartilage in a second iPSC line. MCRIi018-B was differentiated to chondrocytes then some organoids were treated with T3 for 3 weeks from D48 to D69. (A) Toluidine blue and collagen II and X immunostaining showing chondrocytes mature to hypertrophy. (B) Changes in mRNA abundance for selected cartilage, hypertrophic cartilage and bone proteins. N = 3 independent differentiation experiments. (C) The most highly expressed core matrisome genes. Each point represents a determination in three independent differentiations. Highly expressed genes not reaching the statistical threshold for differential expression (adj.P.value < 0.05) are indicated with a red asterisk. (D) Transcription factors dynamically regulated during maturation to hypertrophy. Transcription factors differentially expressed in the RNAseq D69T3 v D48 comparison (adj.P.value  $\leq$  0.05, LogFC  $\geq$  1 or  $\leq$  -1) and expressed at average RPKM >10 at one or more cell line/day/treatment are shown grouped by the direction of change and their known or poorly described role in cartilage development. The points show the average  $\log_2$  RPKM for each group, N = 3 independent differentiations. (E) *IRX3* expression. *IRX3* mRNA abundance fell below the cutoff for panel (D). (F) mRNA abundance of transcription factors in the KEGG circadian rhythm gene set that are dynamically regulated and not shown in panel (D).

**A** MCRIi018-B at D34

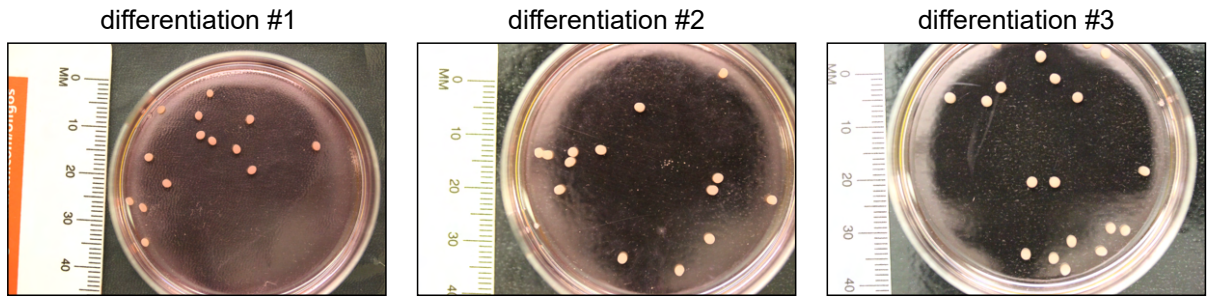

**B**

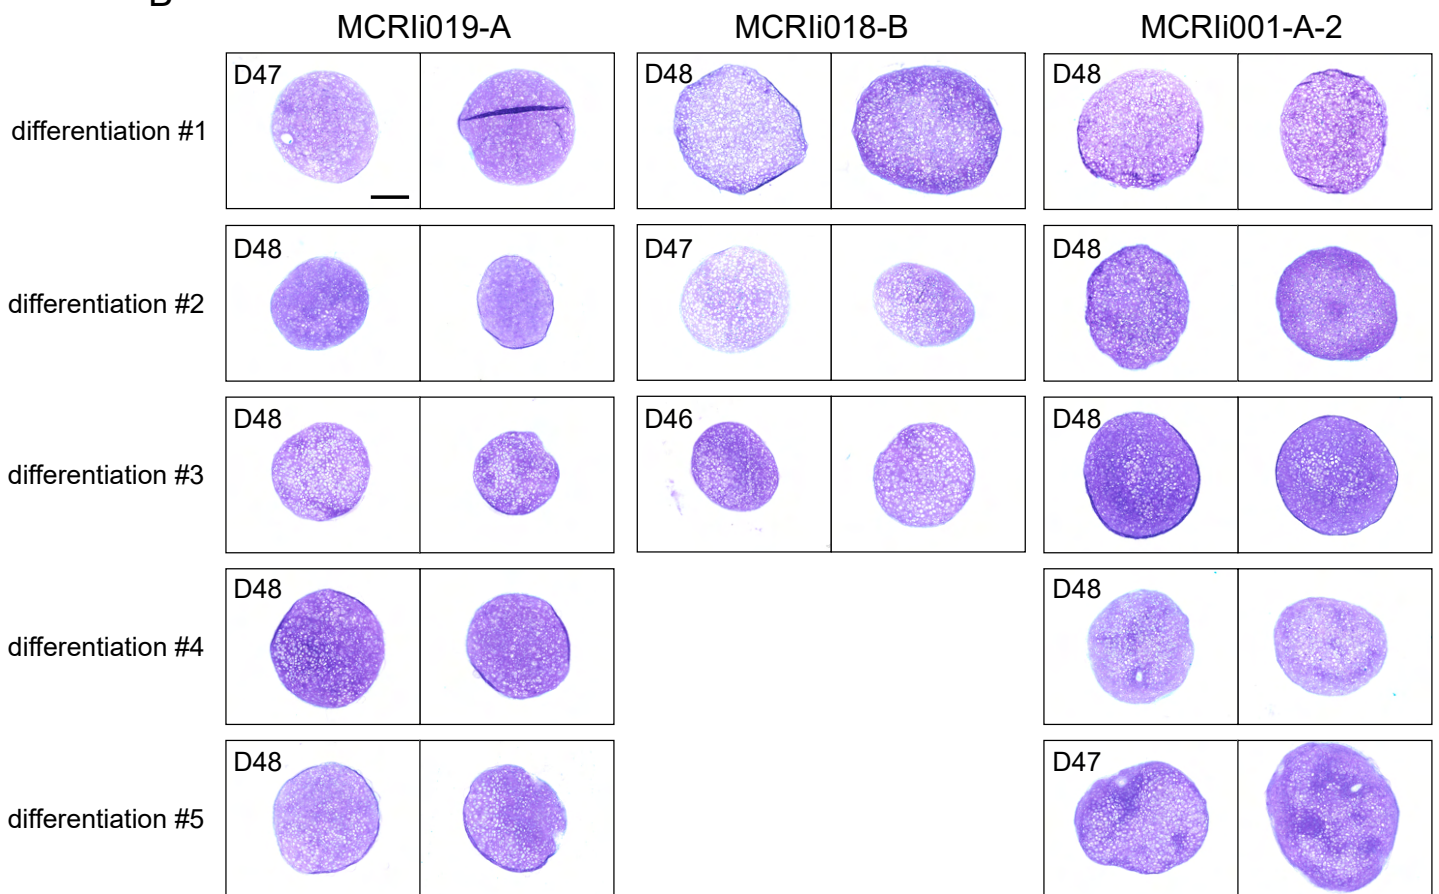

**Fig. S3.** Reproducible iPSC to chondrocyte differentiation. (A) Images show MCRIi018-B chondronoids in 6 cm non-adherent dishes at D34 in three independent differentiations. Note the consistent chondronoid size within and between independent differentiations. (B) Replicate toluidine blue stained chondronoids from 3-5 independent differentiations in three iPSC lines, MCRIi019-A, MCRIi018-B and MCRIi001-A-2. The analysis day, D46, 47 or 48, is indicated for each differentiation. In all lines in all differentiations there is uniform cartilage tissue with no indication of other cell types. Scale bar is 500  $\mu\text{m}$ . Note that the sections are not always at the centre of the chondronoid so they do not reflect the actual chondronoid size.



# A Differentially expressed genes MCRIi018-B v MCRIi019-A

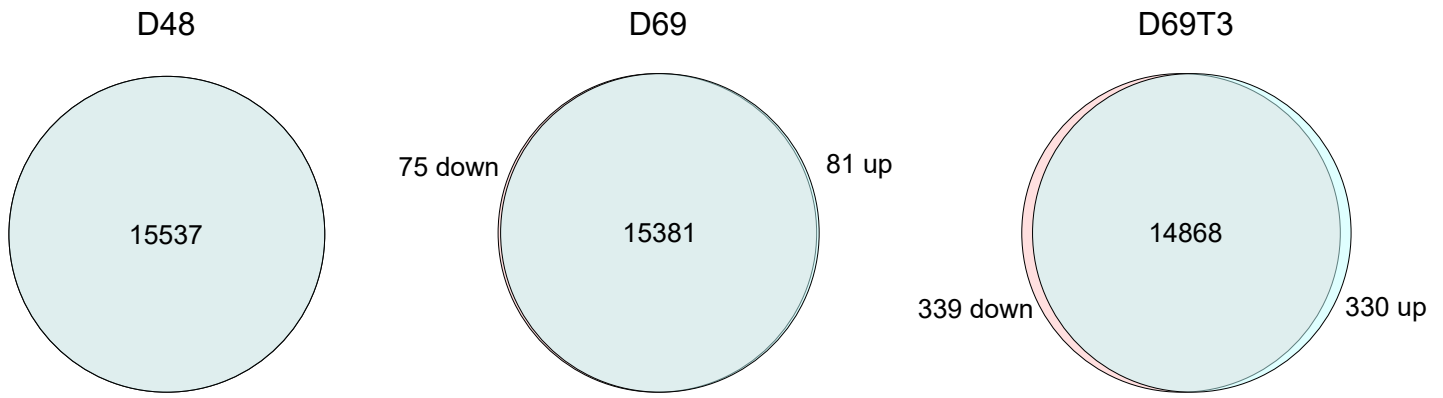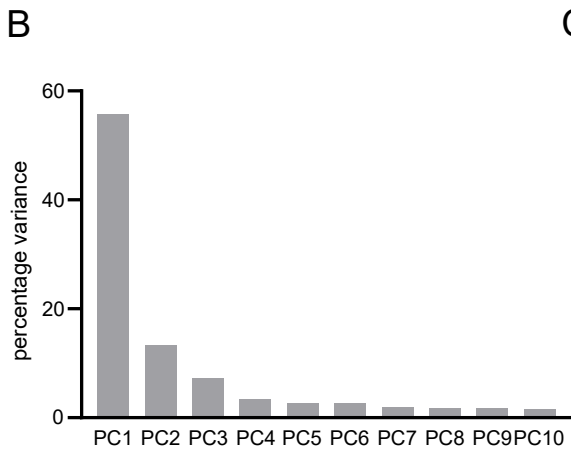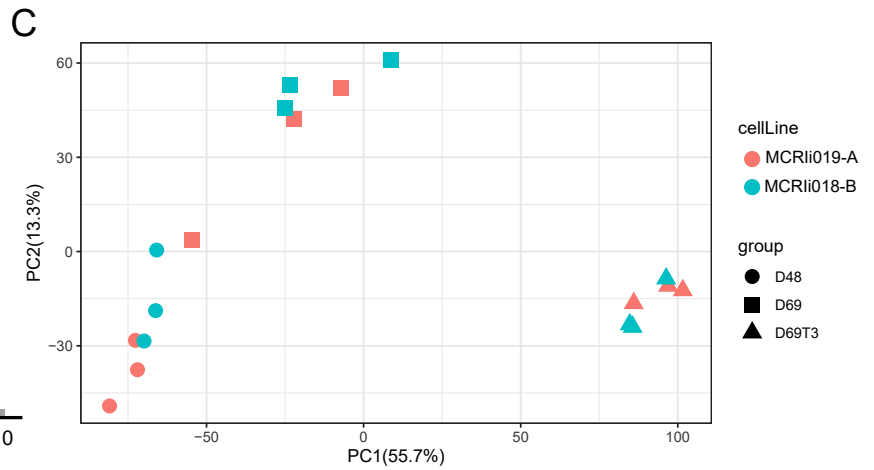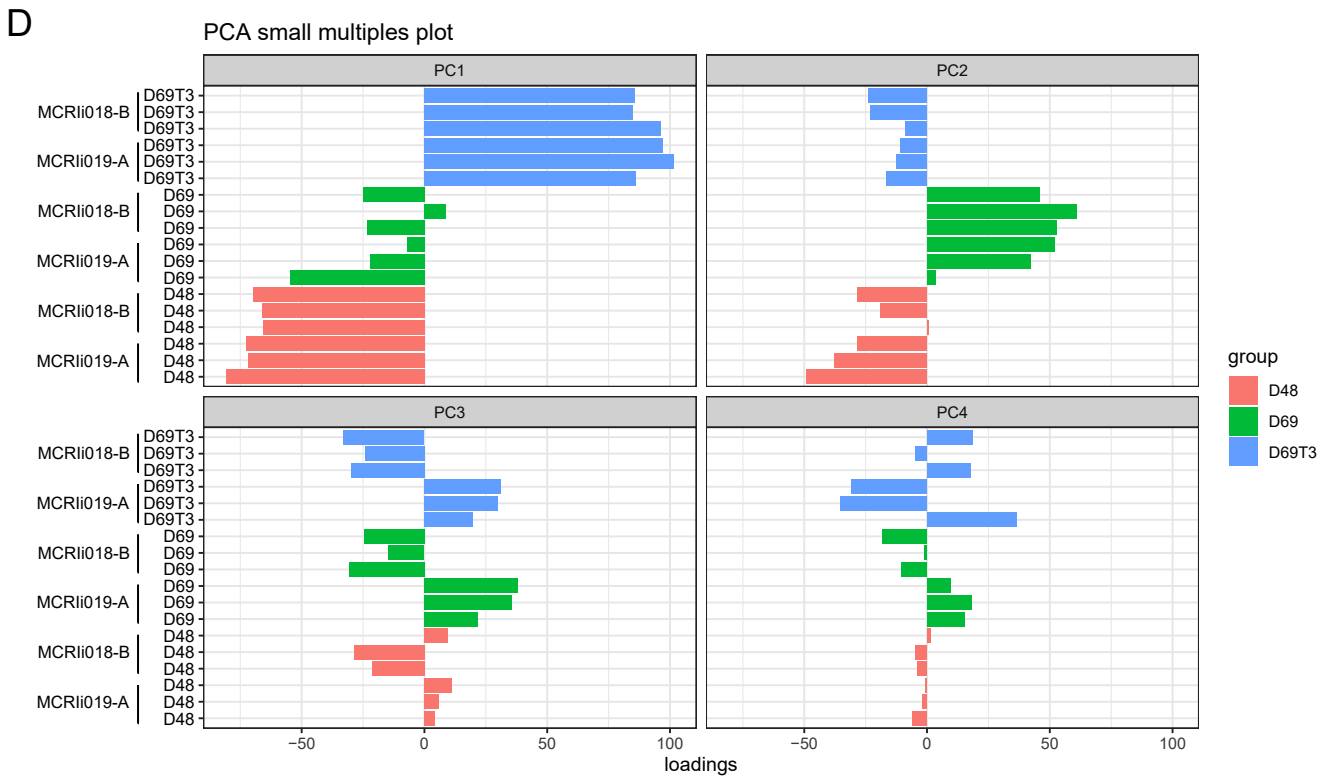

**Fig. S4.** Reproducible gene expression profiles in iPSC-derived chondrocyte maturation. The data relate to the differentiation experiments presented in Fig. 1B-E and Fig. S2. There were three independent differentiations of two iPSC lines, MCRIi018-B and MCRIi019-A. RNA was isolated from all samples at the same time and the RNAseq libraries were made at the same time using the same batch of reagents. (A) The number of differentially expressed genes (adj.P.val  $\leq$  0.05) at D48, D69 and D69 following 3 weeks supplementation with T3. There were no differentially expressed genes at D48. (B) The percentage variance explained by each principal component. (C) Principal component analysis (PCA) plot, PC1 v PC2, showing that samples from independent differentiations of two iPSC lines cluster closely and separate based on differentiation day and treatment. (D) Small multiples plot emphasising that PC1 and PC2, together accounting for 69% of the variation, are largely cell line and differentiation independent. It is only when looking at PC3, which accounts for only 7.3% of the variability that the samples can be separated by iPSC line. PCA was done using the function `prcomp` in base R.

A iPSC-derived implant

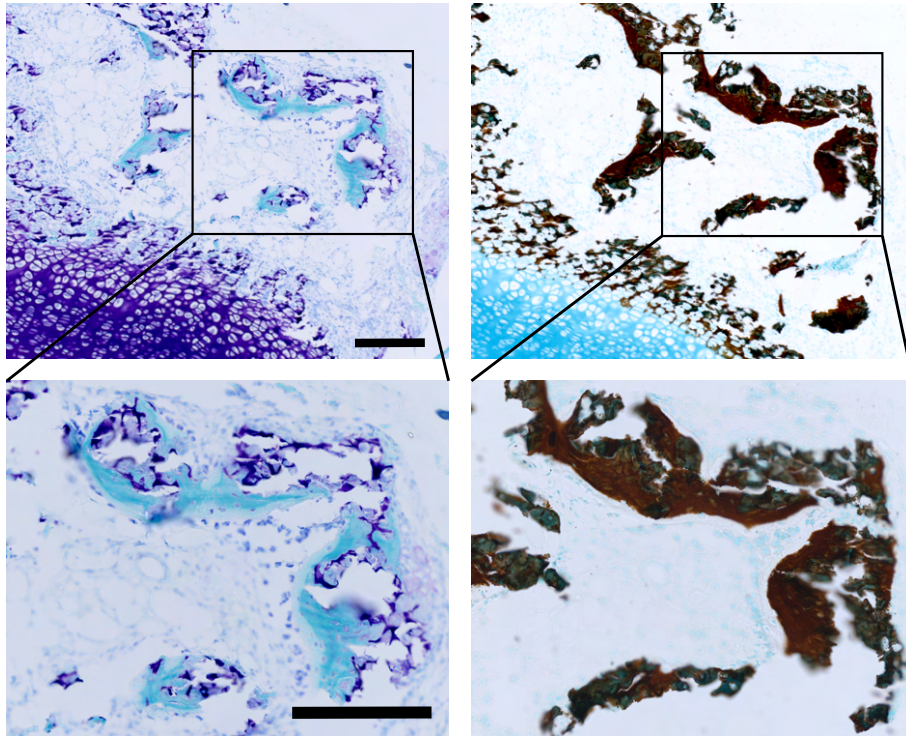

B mouse tibia

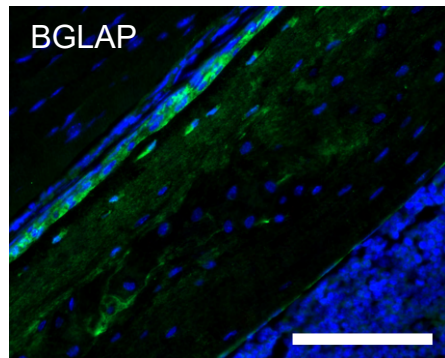

C mouse tibia

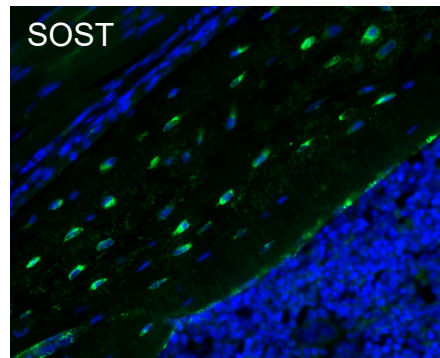

D iPSC-derived implant

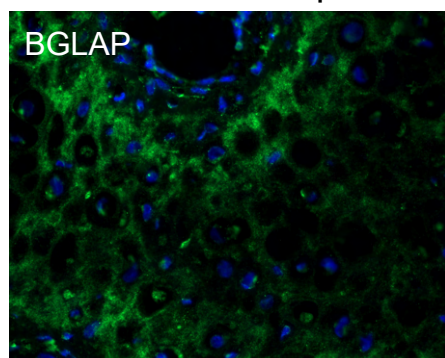

E iPSC-derived implant

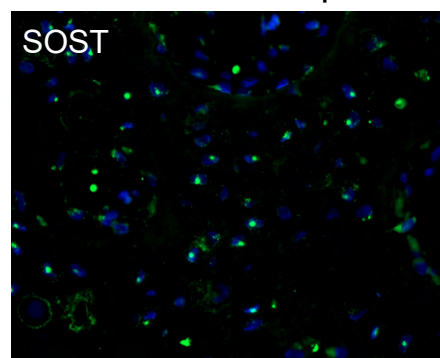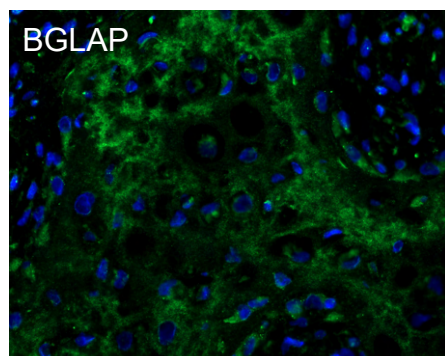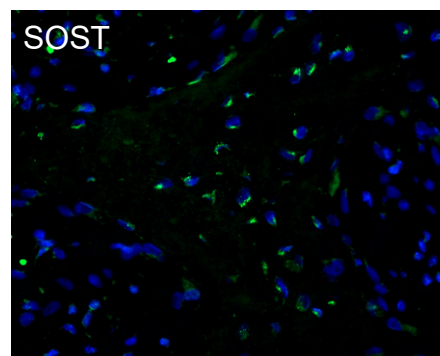

**Fig. S5.** Hypertrophic chondrocyte to osteoblast/osteocyte transition in iPSC-derived organoid implants. (A) Hypertrophic chondronoids were implanted subcutaneously into immunocompromised mice and harvested after 13 weeks. Implants were sectioned and stained with toluidine blue for cartilage proteoglycans and fast green to highlight bone. The image on the right is an adjacent section stained with methyl green for cartilage and von Kossa for mineralization. Higher power images of the areas indicated with the boxes are shown below. The mineralized areas correspond to the fast green positive bone. Scale bars are 200  $\mu\text{m}$ . (B) BGLAP immunostaining in 4-week-old mouse tibia cortical bone. (C) SOST immunostaining in 4-week-old mouse tibia cortical bone. (D) BGLAP immunostaining in a decalcified iPSC-derived implant. (E) SOST immunostaining in a decalcified iPSC-derived implant. The expression and distribution of BGLAP and SOST are similar in the implant bone and mouse bone. Images in panels B-E were taken at the same magnification. Scale bar is 100  $\mu\text{m}$ .

**A**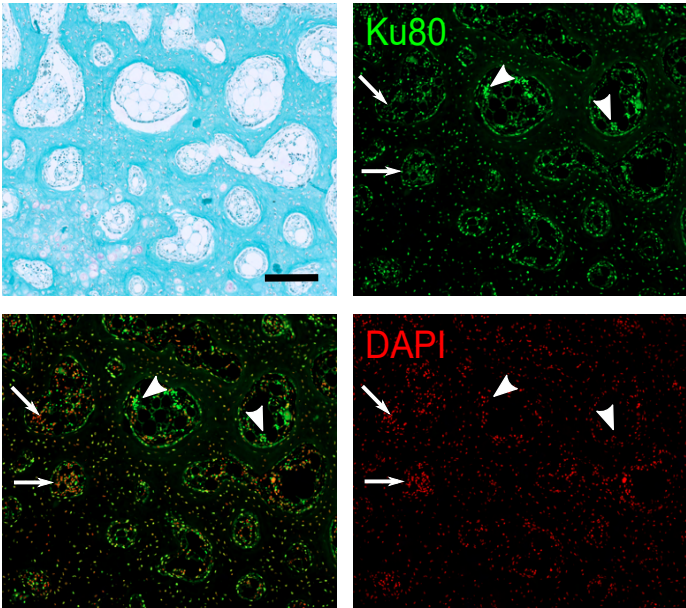**B**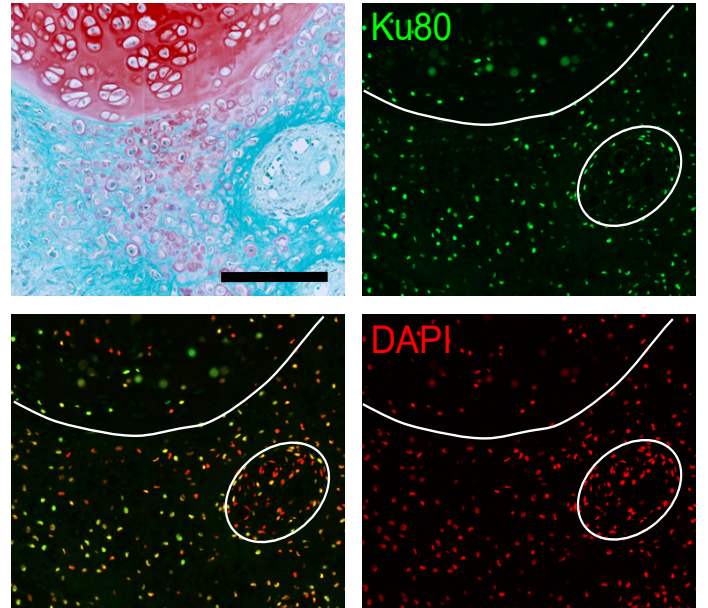**C**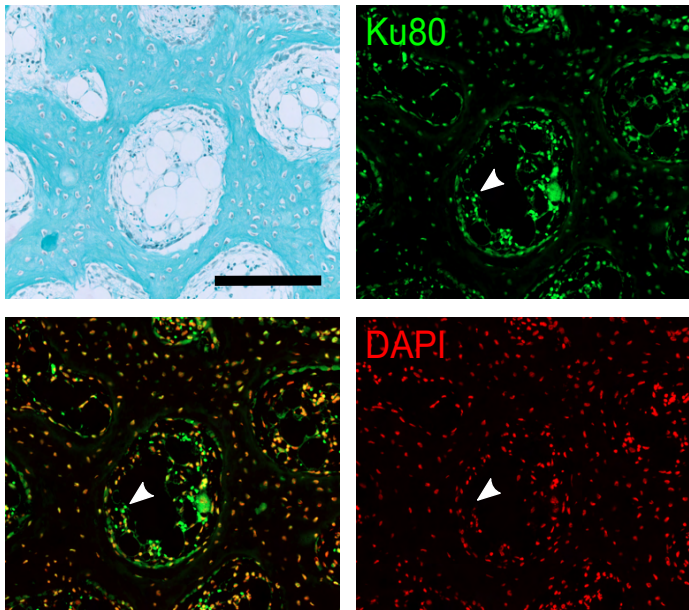**D**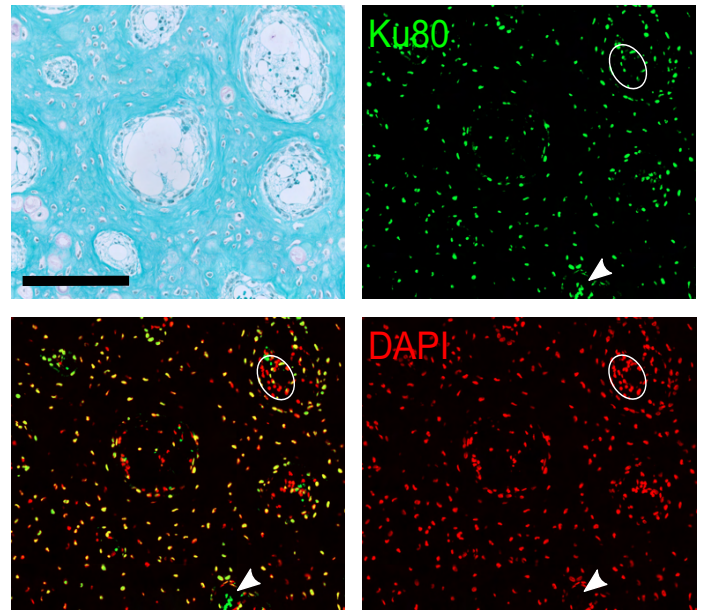

**Fig. S6.** Osteocytes in iPSC-derived organoid implants are human. Implants were decalcified, sectioned, and stained with safranin O for cartilage proteoglycans and fast green to highlight bone. Adjacent sections were immunostained with the human specific antibody Ku80. DAPI staining indicates cell nuclei. There was extensive blood vessel invasion into the implant and large areas of bone surrounding the blood vessels. (A) Blood vessels in the implant contain red blood cells that autofluoresce in the green channel and are DAPI negative (arrow heads). Blood vessels also contain mouse cells indicated by red nuclei that do not stain with Ku80 (arrows). Osteocytes in the bone are Ku80 and DAPI positive indicating they are human and derived from the implanted iPSC-cartilage. (B) Image shows a cartilage area (safranin O stained) and an adjacent area where the chondrocytes are transitioning to osteoblasts, remodelling the cartilage ECM and depositing bone. The blood vessel (circled) contains human cells (Ku80 and DAPI positive) and mouse cells (Ku80 negative, DAPI positive). All the osteocytes in the bone are both Ku80 and DAPI positive indicating they are human. (C) The blood vessel in the center of the image contains autofluorescing red blood cells (arrowhead indicates some examples). Osteocytes in the bone are Ku80 and DAPI positive indicating they are human. (D) Mouse cells (DAPI positive, Ku80 negative) in a blood vessel (circled), and autofluorescing mouse red blood cells (DAPI negative) a blood vessel (arrowhead). Osteocytes in the bone are Ku80 and DAPI positive indicating they are human. We found no evidence that there were mouse cells in the bone. All scale bars are 200  $\mu\text{m}$ .

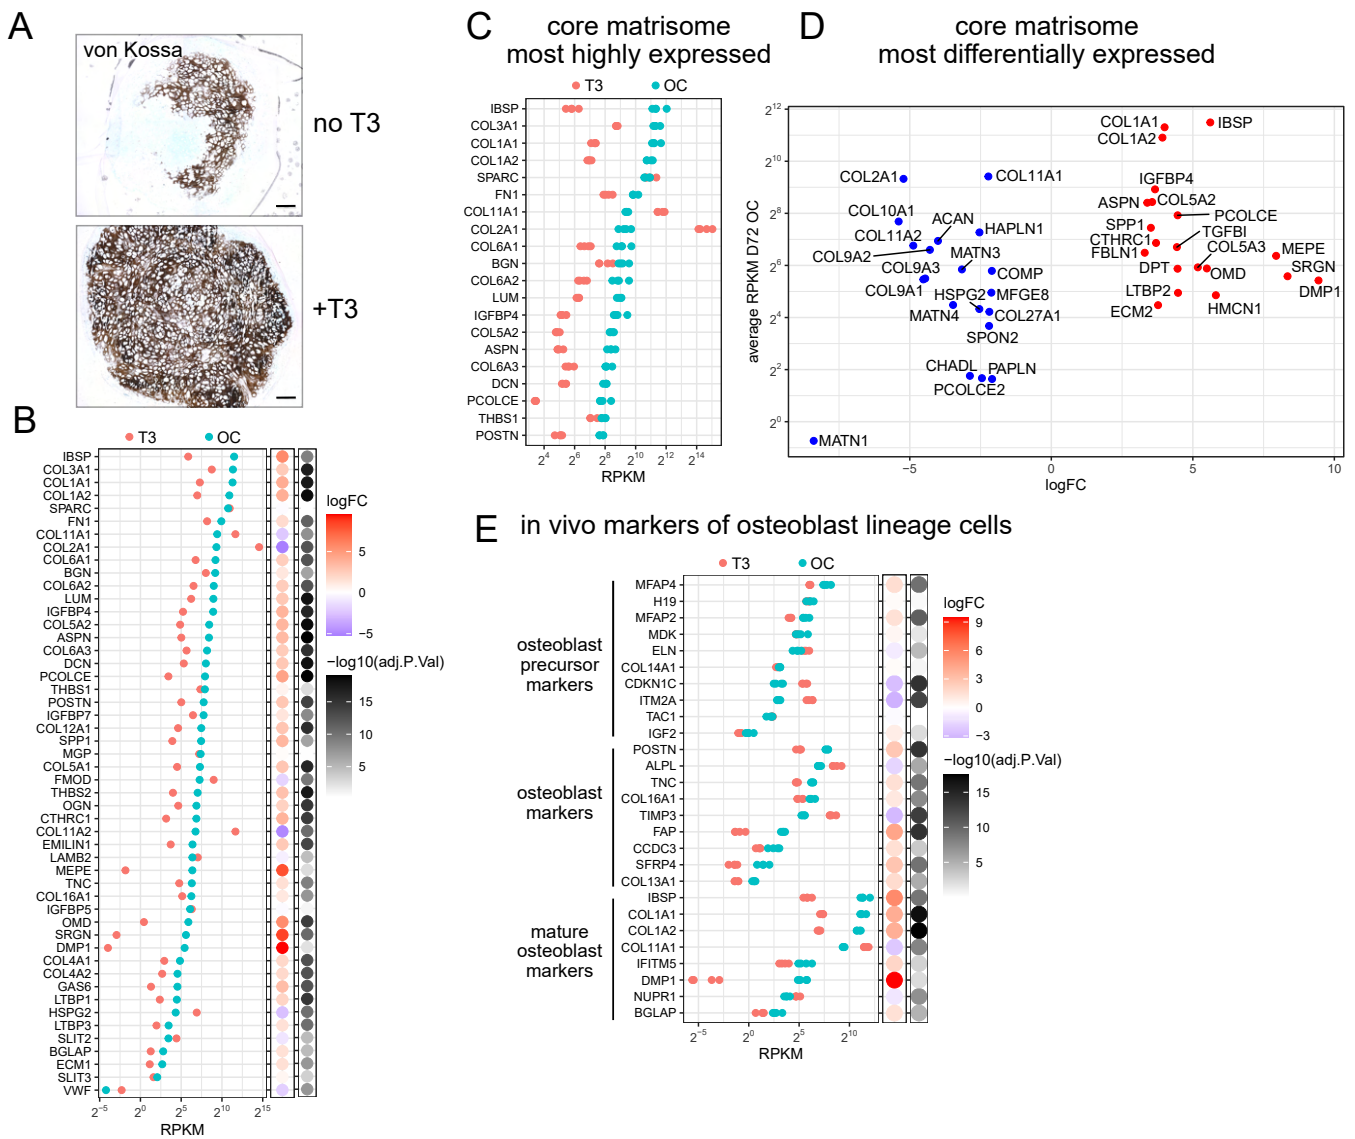

**F** in vivo markers of skeletal lineage cells

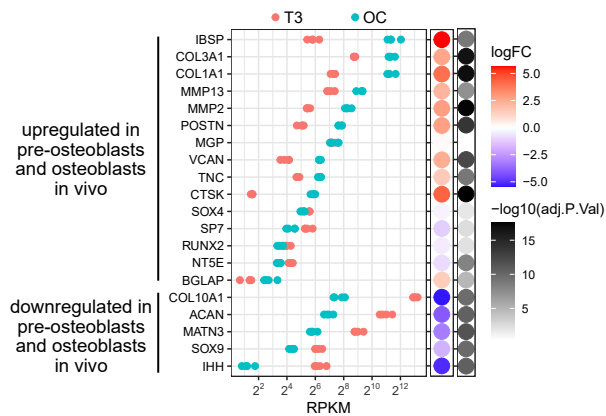

**G** osteogenic transcription factors

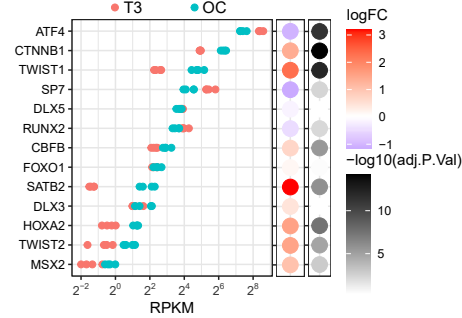

**H** transcription factors most highly expressed

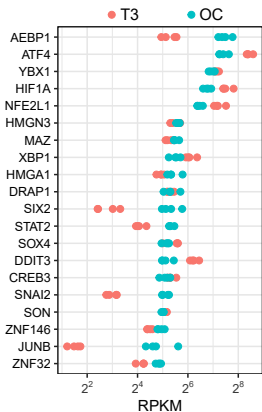

**I** transcription factors most differentially expressed

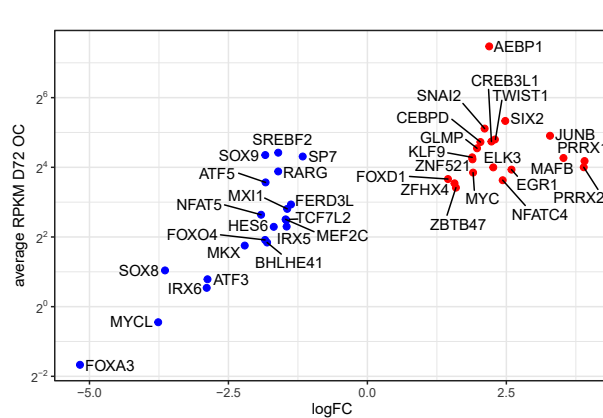

**Fig. S7.** Reproducible *in vitro* hypertrophic chondrocyte to osteoblast transition. (A) T3 treatment primes for transition to osteoblasts. MCRIi001-A-2 was differentiated to cartilage and allowed to mature until day 68. Some chondronoids were then treated with 10 nM T3 for 14 days. From day 82 transition to osteoblasts was induced with osteogenic medium for 3 weeks. There was more extensive and intense von Kossa staining in organoids that had been pre-treated with T3 compared to those without T3 treatment. Scale bar is 200  $\mu$ m. (B) The relative average expression in MCRIi019-A iPSC-derived hypertrophic cartilage (T3) and osteoblasts (OC) of the 50 most highly expressed core matrisome genes in osteocytes isolated from mouse tibia (1). N = 4 parallel differentiations. (C) The most highly expressed core matrisome genes after 3 weeks in osteogenic conditions (OC) (MCRIi019-A) and their relative expression in hypertrophic cartilage (T3). (D) The 20 most upregulated and 20 most downregulated core matrisome genes in osteogenic conditions vs hypertrophic cartilage. (E) Expression of the top transcripts that correspond to osteoblast precursor, osteoblast and mature osteoblast clusters in scRNAseq of cells isolated from mouse calvaria (2) during *in vitro* transdifferentiation. Bubble plot shows logFC and adj.P.value during *in vitro* transdifferentiation. (F) Expression of genes that mark skeletal cell subpopulations in scRNAseq of *in vivo* mouse transdifferentiation (3) during *in vitro* transdifferentiation. (G) Expression of transcription factors known to regulate osteoblast differentiation (4) during *in vitro* transdifferentiation. N = 4 parallel differentiations. (H) The most highly expressed transcription factor genes after 3 weeks in osteogenic conditions (OC) and their relative expression in hypertrophic cartilage (T3). (I) The 20 most upregulated and 20 most downregulated transcription factor genes in osteogenic conditions vs hypertrophic cartilage.



**Table S1.** RT-PCR primer sets for monitoring iPSC to sclerotome differentiation.

| Gene          | Primer    | Sequence 5'-3'        |
|---------------|-----------|-----------------------|
| <i>OCT4</i>   | hOCT4.F   | GAAGTGGGTGGAGGAAGCTG  |
|               | hOCT4.R   | TAGTCGCTGCTTGATCGCTT  |
| <i>MIXL1</i>  | hMIXL1.F  | GGTACCCCGACATCCACTTG  |
|               | hMIXL1.R  | GGGCAGGCAGTTCACATCTA  |
| <i>MSGN1</i>  | hMSGN1.F  | GGCCTGGTAGAGGTGGACTA  |
|               | hMSGN1.R  | ACAGGTGGCAGGTAATTCCG  |
| <i>MEOX1</i>  | hMEOX1.F  | ACTCGGCTCCGCAGATATGA  |
|               | hMEOX1.R  | GAACTTGGAGAGGCTGTGGA  |
| <i>PAX1</i>   | hPAX1.F   | ACTTCCCTGCCAAAGGTAGC  |
|               | hPAX1.R   | CCTCACACCTTCAAATGCCC  |
| <i>SOX9</i>   | hSOX9.F   | AAGTCGGTGAAGAACGGGC   |
|               | hSOX9.R   | TCTCGCTTCAGGTCAGCCTT  |
| <i>COL2A1</i> | hCOL2A1.F | TCACGTACACTGCCCTGAAG  |
|               | hCOL2A1.R | GCCCTATGTCCACACCGAAT  |
| <i>ACTB</i>   | hACTB.F   | AAGTCCCTTGCCATCCTAAAA |
|               | hACTB.R   | ATGCTATCACCTCCCCTGTG  |

## SI References

1. S. E. Youtlen, *et al.*, Osteocyte transcriptome mapping identifies a molecular landscape controlling skeletal homeostasis and susceptibility to skeletal disease. *Nat. Commun.* **12**, 2444 (2021).
2. U. M. Ayturk, *et al.*, Single-Cell RNA Sequencing of Calvarial and Long-Bone Endocortical Cells. *J. Bone Miner. Res. Off. J. Am. Soc. Bone Miner. Res.* **35**, 1981–1991 (2020).
3. A. Haseeb, *et al.*, SOX9 keeps growth plates and articular cartilage healthy by inhibiting chondrocyte dedifferentiation/osteoblastic redifferentiation. *Proc. Natl. Acad. Sci. U. S. A.* **118** (2021).
4. W. C. W. Chan, Z. Tan, M. K. T. To, D. Chan, Regulation and Role of Transcription Factors in Osteogenesis. *Int. J. Mol. Sci.* **22**, 5445 (2021).
